# Supplementary material for: Real-World Safety Data of the Orphan Drug Onasemnogene Abeparvovec (Zolgensma®) for the SMA Rare Disease: A Pharmacovigilance Study Based on the EMA Adverse Event Reporting System
Source: MDPI journal article supplement (doi:10.3390/ph17030394), 2024-03-19
Supplement: s1 [file s1]

## Supplementary Tables

### Real-world safety data of the orphan drug Onasemnogene Abeparvovec (Zolgensma®) for the SMA rare disease: a pharmacovigilance study based on the EMA adverse event reporting system

**Supplementary Table S1.** Other suspected drugs reported in the Individual Case Safety Reports related to Zolgensma® (onasemnogene abeparvovec) collected in the EudraVigilance database from 2019 to 22 September 2023 and their distribution by therapeutic indications.

|                             | Overall<br>(N=74) |
|-----------------------------|-------------------|
| <b>Other Suspected Drug</b> |                   |
| Amoxicillin                 | 1 (1.4%)          |
| Ampicillin                  | 1 (1.4%)          |
| Calcium Gluconate           | 1 (1.4%)          |
| Cefuroxime                  | 1 (1.4%)          |
| Cortisone                   | 1 (1.4%)          |
| Dexamethasone               | 1 (1.4%)          |
| Famotidine                  | 2 (2.7%)          |
| Fentanyl                    | 1 (1.4%)          |
| Ibuprofen                   | 1 (1.4%)          |
| Lansoprazole                | 1 (1.4%)          |
| Lorazepam                   | 1 (1.4%)          |
| Meropenem                   | 1 (1.4%)          |
| Methadone                   | 1 (1.4%)          |
| Methylprednisolone          | 1 (1.4%)          |
| Midazolam                   | 1 (1.4%)          |
| Montelukast Sodium          | 1 (1.4%)          |
| Nusinersen                  | 23 (31.1%)        |
| Ondansetron                 | 1 (1.4%)          |
| Oseltamivir                 | 1 (1.4%)          |
| Paracetamol                 | 1 (1.4%)          |
| Prednisolone                | 26 (35.1%)        |

|                                          | <b>Overall<br/>(N=74)</b> |
|------------------------------------------|---------------------------|
| Prednisone                               | 1 (1.4%)                  |
| Ramipril                                 | 1 (1.4%)                  |
| Risdiplam                                | 1 (1.4%)                  |
| Vitamin K                                | 2 (2.7%)                  |
| <b>Therapeutic Indication</b>            |                           |
| Gastritis Prophylaxis                    | 1 (1.4%)                  |
| Pyrexia                                  | 1 (1.4%)                  |
| H1n1 Influenza                           | 1 (1.4%)                  |
| Hepatic Enzyme Increased                 | 2 (2.7%)                  |
| Hepatitis                                | 1 (1.4%)                  |
| Hepatotoxicity                           | 2 (2.7%)                  |
| Hypertension                             | 1 (1.4%)                  |
| Immunomodulatory Therapy                 | 3 (4.1%)                  |
| Immunosuppression                        | 1 (1.4%)                  |
| In Vivo Gene Therapy                     | 1 (1.4%)                  |
| International Normalised Ratio Increased | 2 (2.7%)                  |
| Not Available                            | 11 (14.9%)                |
| Non Infective Gingivitis                 | 1 (1.4%)                  |
| Product Used For Unknown Indication      | 23 (31.1%)                |
| Prophylaxis                              | 1 (1.4%)                  |
| Sinus Tachycardia                        | 1 (1.4%)                  |
| Spinal Muscular Atrophy                  | 20 (27.0%)                |
| Urinary Tract Infection                  | 1 (1.4%)                  |

**Supplementary Table S2.** MedDRA Preferred Terms with fatal outcome reported in the Individual Case Safety Reports related to Zolgensma® (onasemnogene abeparvovec) collected in the EudraVigilance database from 2019 up to 22 September 2023 and their distribution by patient sex and age groups.

|                                      | <b>Overall<br/>(N=130)</b> |
|--------------------------------------|----------------------------|
| <b>MedDRA Preferred Terms</b>        |                            |
| Abdominal sepsis                     | 1 (0.8%)                   |
| Acute hepatic failure                | 4 (3.1%)                   |
| Acute kidney injury                  | 1 (0.8%)                   |
| Acute respiratory failure            | 1 (0.8%)                   |
| Alanine aminotransferase increased   | 1 (0.8%)                   |
| Aspartate aminotransferase increased | 1 (0.8%)                   |
| Aspiration                           | 3 (2.3%)                   |
| Asthenia                             | 3 (2.3%)                   |
| Atelectasis                          | 1 (0.8%)                   |
| Bacterial infection                  | 1 (0.8%)                   |
| Bilirubin conjugated increased       | 1 (0.8%)                   |
| Blood bilirubin increased            | 1 (0.8%)                   |
| Blood creatinine increased           | 1 (0.8%)                   |
| Blood pressure decreased             | 1 (0.8%)                   |
| Blood urea increased                 | 1 (0.8%)                   |
| Bradycardia                          | 2 (1.5%)                   |
| Brain death                          | 1 (0.8%)                   |
| Brain injury                         | 1 (0.8%)                   |
| Bronchial obstruction                | 1 (0.8%)                   |
| Cardiac arrest                       | 8 (6.2%)                   |
| Cardiac failure                      | 1 (0.8%)                   |
| Cardio-respiratory arrest            | 2 (1.5%)                   |
| Condition aggravated                 | 1 (0.8%)                   |

|                                      | <b>Overall<br/>(N=130)</b> |
|--------------------------------------|----------------------------|
| COVID-19                             | 1 (0.8%)                   |
| Cyanosis                             | 2 (1.5%)                   |
| Death                                | 8 (6.2%)                   |
| Diarrhoea                            | 1 (0.8%)                   |
| Disease progression                  | 2 (1.5%)                   |
| Drug-induced liver injury            | 1 (0.8%)                   |
| Dyspnoea                             | 2 (1.5%)                   |
| Emphysema                            | 1 (0.8%)                   |
| Epistaxis                            | 1 (0.8%)                   |
| Escherichia sepsis                   | 1 (0.8%)                   |
| Eye colour change                    | 1 (0.8%)                   |
| Eye movement disorder                | 1 (0.8%)                   |
| Gastrointestinal bacterial infection | 1 (0.8%)                   |
| Gastrointestinal infection           | 1 (0.8%)                   |
| Gastrointestinal necrosis            | 1 (0.8%)                   |
| Heart rate increased                 | 2 (1.5%)                   |
| Hepatic encephalopathy               | 2 (1.5%)                   |
| Hepatic enzyme increased             | 1 (0.8%)                   |
| Hepatic fibrosis                     | 1 (0.8%)                   |
| Hepatic function abnormal            | 2 (1.5%)                   |
| Hepatitis                            | 1 (0.8%)                   |
| Hepatotoxicity                       | 3 (2.3%)                   |
| Hydrocephalus                        | 1 (0.8%)                   |
| Hyperhidrosis                        | 1 (0.8%)                   |
| Hypertension                         | 1 (0.8%)                   |
| Hypotension                          | 1 (0.8%)                   |
| Ill-defined disorder                 | 1 (0.8%)                   |
| Immune system disorder               | 1 (0.8%)                   |

|                                       | <b>Overall<br/>(N=130)</b> |
|---------------------------------------|----------------------------|
| Influenza                             | 1 (0.8%)                   |
| Irregular breathing                   | 1 (0.8%)                   |
| Jaundice                              | 2 (1.5%)                   |
| Lethargy                              | 1 (0.8%)                   |
| Leukocytosis                          | 1 (0.8%)                   |
| Mass                                  | 1 (0.8%)                   |
| Metapneumovirus pneumonia             | 1 (0.8%)                   |
| Multiple organ dysfunction syndrome   | 3 (2.3%)                   |
| Ocular icterus                        | 1 (0.8%)                   |
| Peripheral coldness                   | 1 (0.8%)                   |
| Pneumonia                             | 3 (2.3%)                   |
| Pneumonia aspiration                  | 1 (0.8%)                   |
| Pyrexia                               | 2 (1.5%)                   |
| Rebound effect                        | 2 (1.5%)                   |
| Respiratory arrest                    | 5 (3.8%)                   |
| Respiratory disorder                  | 1 (0.8%)                   |
| Respiratory distress                  | 1 (0.8%)                   |
| Respiratory failure                   | 5 (3.8%)                   |
| Respiratory syncytial virus infection | 1 (0.8%)                   |
| Secretion discharge                   | 1 (0.8%)                   |
| Sepsis                                | 2 (1.5%)                   |
| Soft tissue necrosis                  | 1 (0.8%)                   |
| Spinal muscular atrophy               | 1 (0.8%)                   |
| Thrombocytopenia                      | 2 (1.5%)                   |
| Toxic encephalopathy                  | 1 (0.8%)                   |
| Transaminases increased               | 1 (0.8%)                   |
| Viral infection                       | 1 (0.8%)                   |
| Vomiting                              | 4 (3.1%)                   |

|                    | Overall<br>(N=130) |
|--------------------|--------------------|
| <b>Sex</b>         |                    |
| Female             | 72 (55.4%)         |
| Male               | 36 (27.7%)         |
| Not Specified      | 22 (16.9%)         |
| <b>Age group</b>   |                    |
| 0-1 Month          | 1 (0.8%)           |
| 2 Months - 2 Years | 123 (94.6%)        |
| Not Specified      | 6 (4.6%)           |
